# Supplementary material for: Mapping gene expression quantitative trait loci by singular value decomposition and independent component analysis
Source: Springer Nature journal article supplement (doi:10.1186/1471-2105-9-244), 2008-05-20

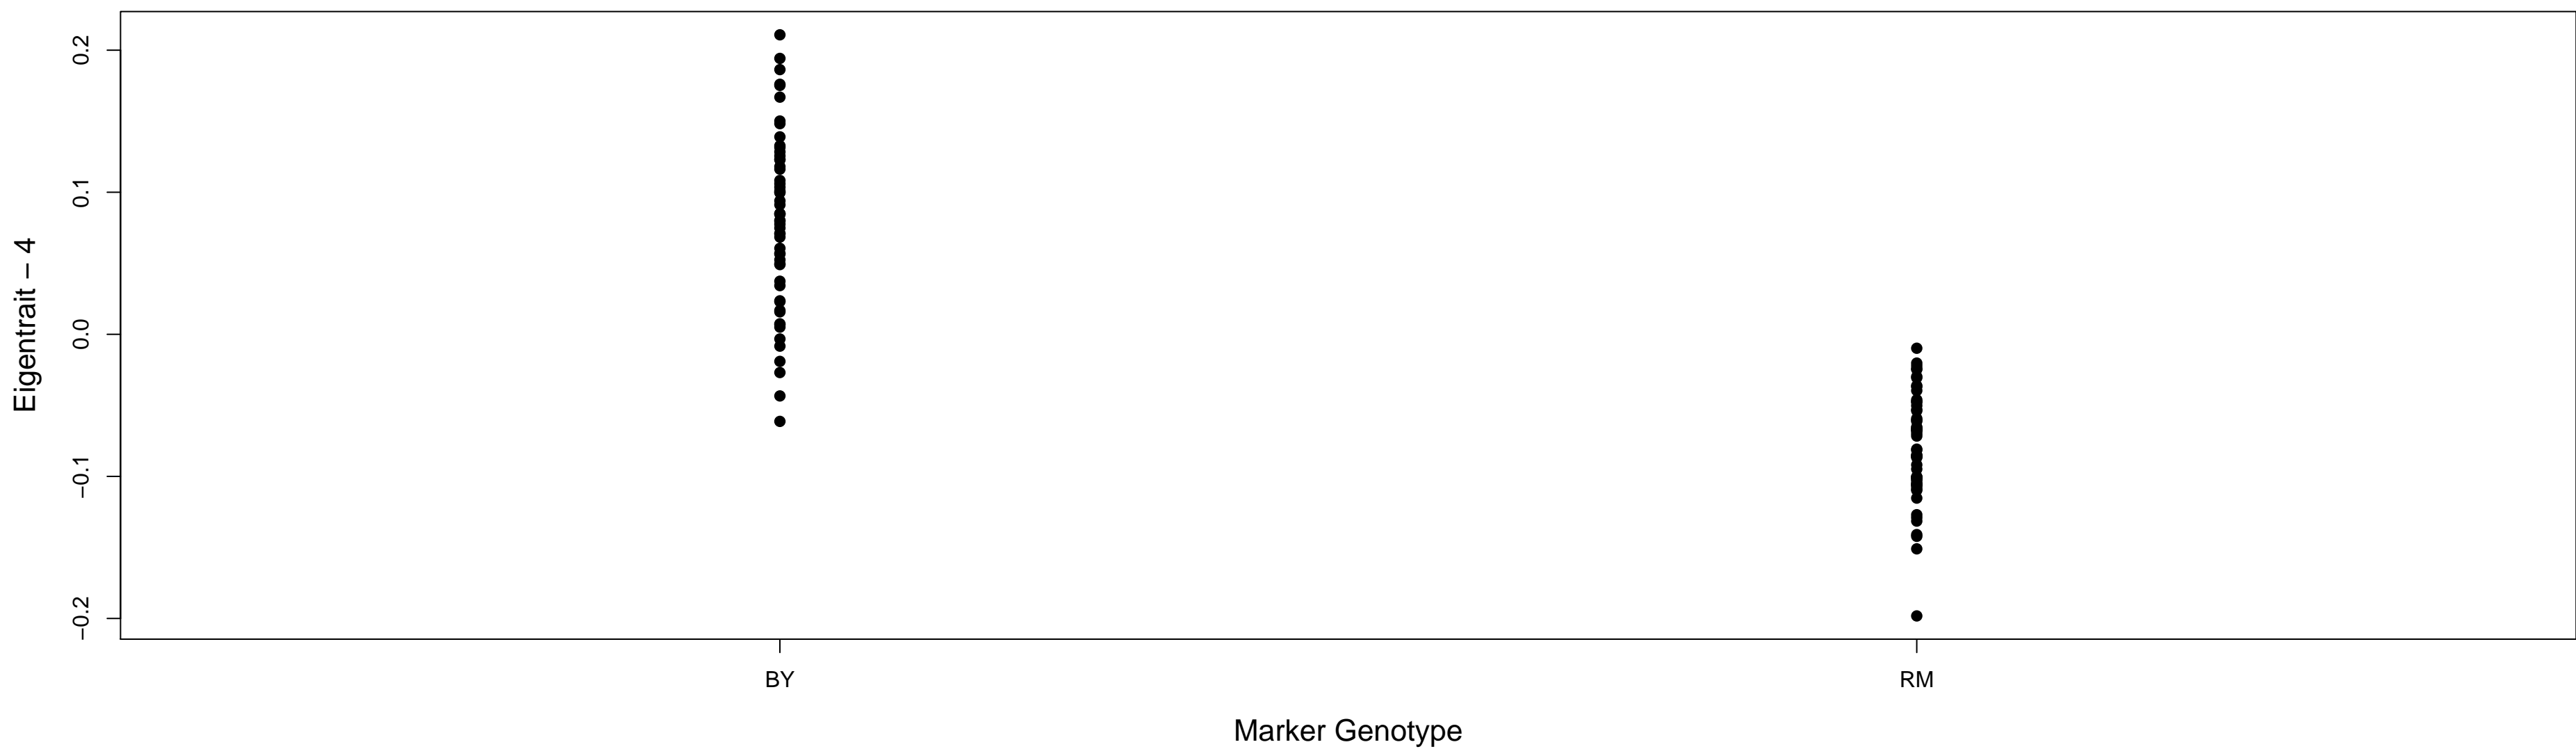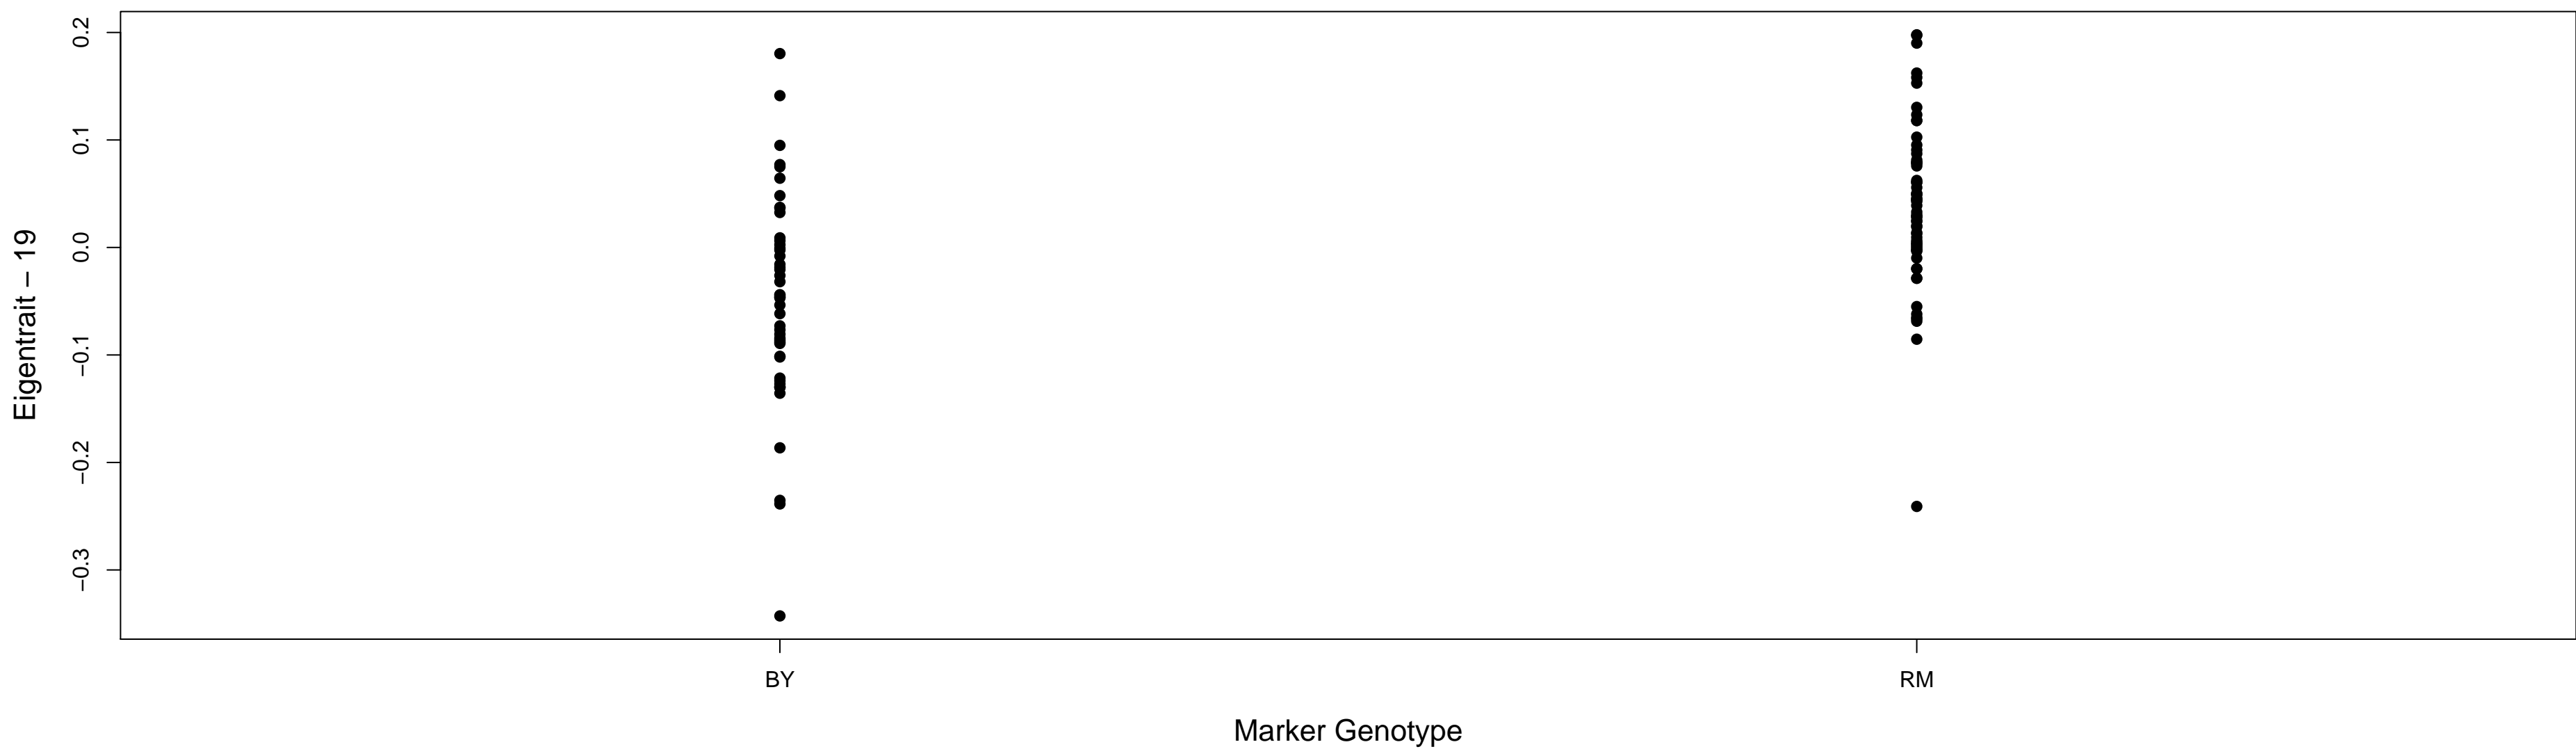

Supplement: 12859_2008_2229_MOESM7_ESM.pdf [file 12859_2008_2229_MOESM7_ESM.pdf]
